# Supplementary material for: Spatial scale of receptive fields in the visual sector of the cat thalamic reticular nucleus
Source: PubMed Central journal article supplement (PMC5630618; doi:10.1038/s41467-017-00762-7), 2017-10-06
Supplement: 41467_2017_762_MOESM1_ESM.pdf [file 41467_2017_762_MOESM1_ESM.pdf]

File Name: Supplementary Information

Description: Supplementary Figures, Supplementary Tables and Supple

File Name: Peer Review File

1 SUPPLEMENTARY MATERIALS

2 Supplementary Figure 1

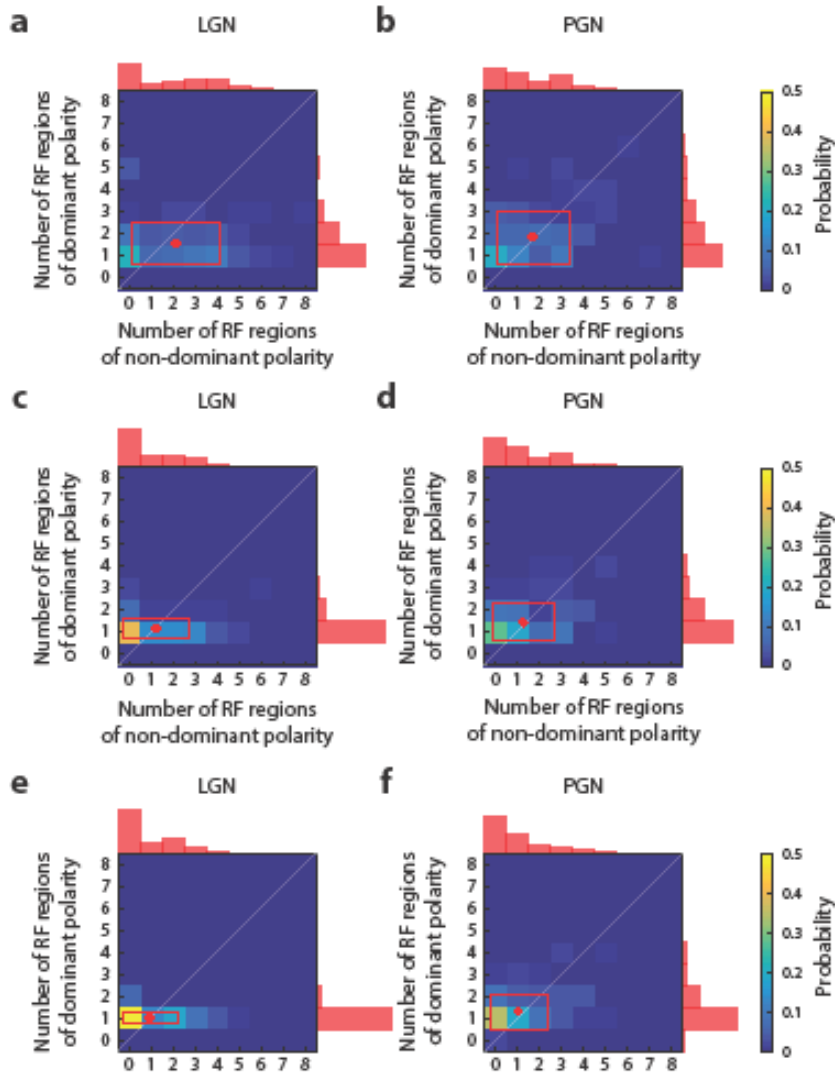

Supplementary Figure 1. *Spatially discrete regions in footprints for cells in the LGN and PGN.* The number of contiguous regions in footprints for LGN (left column) and PGN (right column); counts of regions of the dominant and non-dominant sign plotted against each other. The three rows of plots were made using thresholds of different stringencies. For panels **a** and **b**,  $q = 0.05$ ; for panels **c** and **d**,  $q = 0.01$ ; for panels **e** and **f**,  $q = 0.001$ . For each panel, the number of contiguous regions in the footprint for the dominant polarity is plotted against that for the non-dominant polarity, with the color code representing the frequency at which the pertinent numbers of RF regions were observed. Marginal histograms at the top and side of each plot show distributions for footprints of the dominant versus non-

3 Supplementary Figure 2

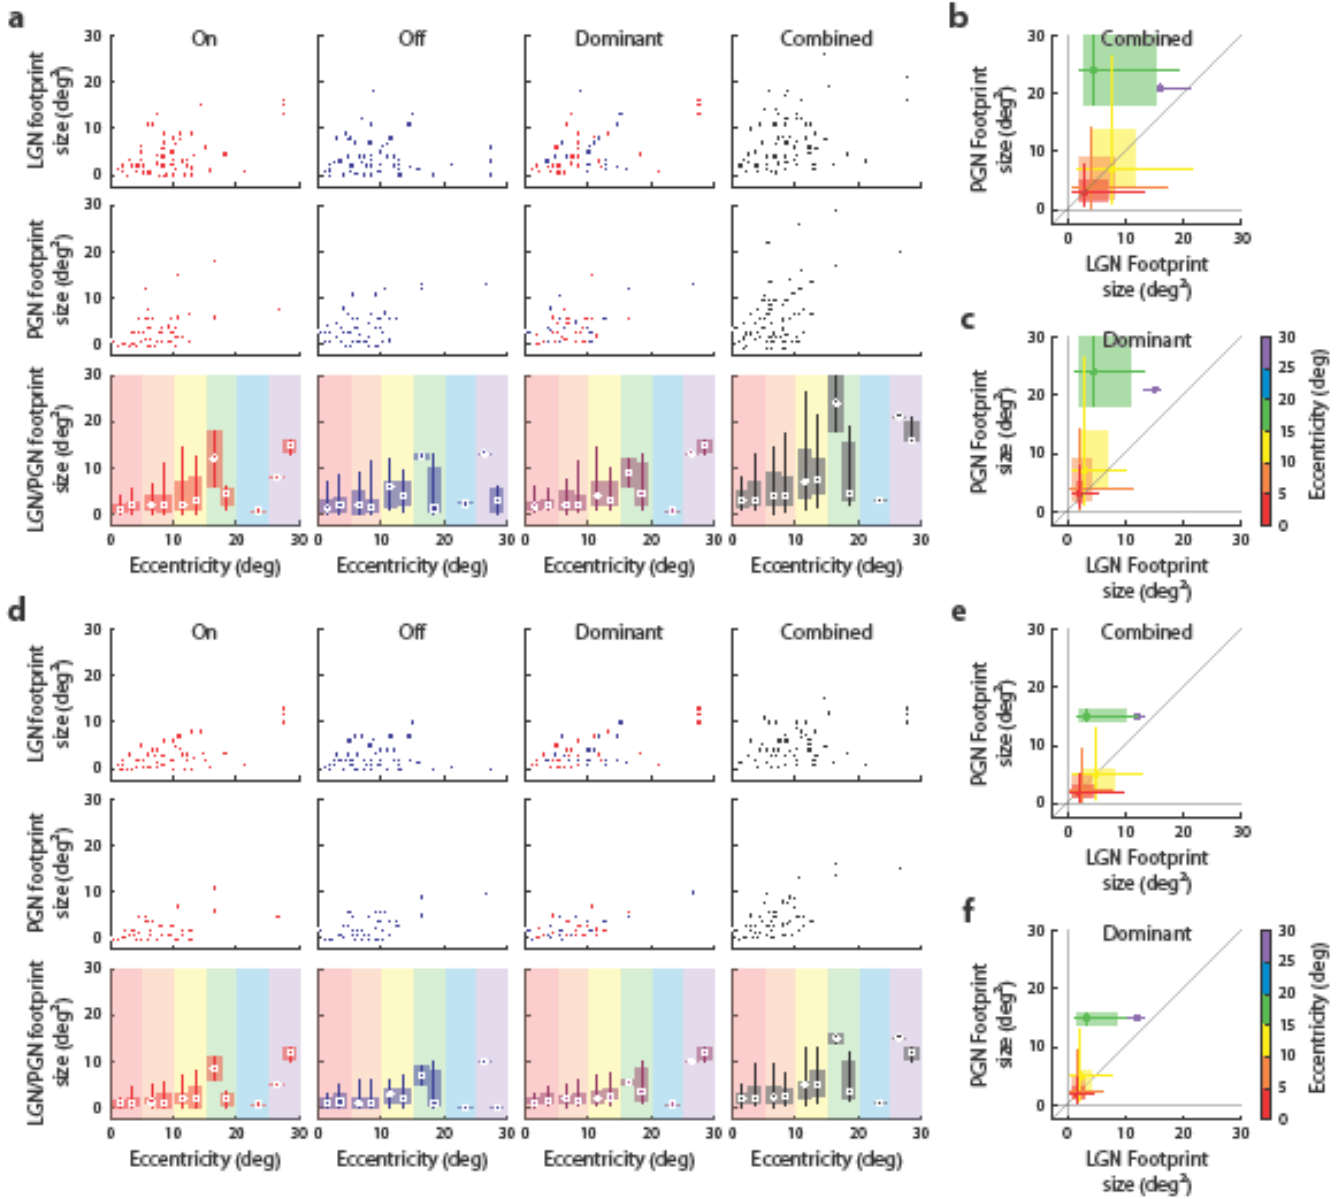

Supplementary Figure 2. *Footprints of cells in the LGN and PGN calculated using different threshold levels.* Conventions are as for Fig. 4 in the main text. Panels **a-c** in this figure were made from footprints generated with threshold,  $q = 0.05$ ; panels **d-f** were generated with threshold,  $q = 0.001$ .

4 **Estimate of cell number in the PGN**

5 To address the questions of whether or not there might be enough cells in the PGN to  
6 cover visual space at a scale comparable to the LGN, we used data from the literature and our  
7 own measurements of the borders of the PGN and LGN from Nissl stained material to estimate  
8 the number of cells in the PGN. We then compared that estimate with accounts of the number of  
9 Y ganglion cells in retina.

10 Supplementary table 1 summarizes counts of different types of ganglion cells in the cat's  
11 retina. Supplementary table 2 summarizes the nuclear volume, cell densities and cell counts in  
12 the cat's visual thalamus, with measurements from previous reports and from our own laboratory.  
13 In conclusion, the calculations based on our data as well as on previous anatomical studies  
14 suggest that the total number of neurons in the PGN ( $\sim 1.55 \times 10^4$ ) is 2-3 times greater than that of  
15 alpha (Y-type) retinal ganglion cells ( $6.7 \times 10^3$ ) in the cat.

## 16 Supplementary Table 1

## 17 Counts of retinal ganglion cells in the cat

| Ganglion cell type     |                           | Cell count                     |
|------------------------|---------------------------|--------------------------------|
| Alpha                  | Total <sup>53-55</sup>    | $6.7 \times 10^3$              |
|                        | ON (45%, <sup>56</sup> )  | $3.0 \times 10^3$ <sup>a</sup> |
|                        | OFF (55%, <sup>56</sup> ) | $3.7 \times 10^3$ <sup>b</sup> |
| Beta <sup>53, 56</sup> |                           | $8.9 \times 10^4$              |
| Gamma <sup>53</sup>    |                           | $5.5 \times 10^3$              |

18

---

<sup>a</sup> Number derived from calculation based on percentage.<sup>b</sup> Number derived from calculation based on percentage.

19 Supplementary Table 2

20 Nuclear volume, cell density, and cell counts for the visual thalamus of the cat

| Anatomical structure             |                          | LGN                                            |                                                |                                                         | PGN                                                                                                                     |
|----------------------------------|--------------------------|------------------------------------------------|------------------------------------------------|---------------------------------------------------------|-------------------------------------------------------------------------------------------------------------------------|
|                                  |                          | A                                              | A1                                             | Entire A laminae                                        |                                                                                                                         |
| Volume (mm <sup>3</sup> )        | Based on <sup>57</sup>   | 9.47<br>(47.4%)                                | 6.88<br>(34.7%)                                | 19.8                                                    | -                                                                                                                       |
|                                  | Based on our measurement | 9.68<br>(47.7%)                                | 5.91<br>(29.1%)                                | 20.3                                                    | -                                                                                                                       |
| Cell density (mm <sup>-3</sup> ) | Based on <sup>57</sup>   | 2.98×10 <sup>4</sup>                           | 2.97×10 <sup>4</sup>                           | -                                                       | -                                                                                                                       |
|                                  | Based on our measurement | 2.90×10 <sup>4</sup>                           | 3.53×10 <sup>4</sup>                           | -                                                       | 1.508×10 <sup>3</sup> per unit volume of A laminae (based on <sup>58</sup> )                                            |
| Cell count                       | Total                    | 2.80×10 <sup>5</sup><br>Based on <sup>57</sup> | 2.09×10 <sup>5</sup><br>Based on <sup>57</sup> | 4.89×10 <sup>5</sup> <sup>c</sup> ( <sup>57</sup> )     | 2.35×10 <sup>4</sup><br>[1.55×10 <sup>4</sup> ]<br>(number in brackets after the Abercrombie correction <sup>59</sup> ) |
|                                  | X cell                   | -                                              | -                                              | 2.05×10 <sup>5</sup> <sup>d</sup> (42%, <sup>60</sup> ) |                                                                                                                         |
|                                  | Y cell                   | -                                              | -                                              | 1.71×10 <sup>5</sup> <sup>e</sup> (35%, <sup>60</sup> ) |                                                                                                                         |
|                                  | Interneuron              | -                                              | -                                              | 1.12×10 <sup>5</sup> <sup>f</sup> (23%, <sup>61</sup> ) |                                                                                                                         |

21

<sup>c</sup> Number derived from adding components.

<sup>d</sup> Number derived from calculation based on percentage.

<sup>e</sup> Number derived from calculation based on percentage.

<sup>f</sup> Number derived from calculation based on percentage.

22 **SUPPLEMENTARY REFERENCES**

23

- 24 53. Illing, R.B. & Wässle, H. The retinal projection to the thalamus in the cat: a quantitative  
25 investigation and a comparison with the retinotectal pathway. *J. Comp. Neurol.* 202, 265-285  
26 (1981).
- 27 54. Stone, J. The number and distribution of ganglion cells in the cat's retina. *The Journal of*  
28 *Comparative Neurology* 180, 753-771 (1978).
- 29 55. Wässle, H., Levick, W.R. & Cleland, B.G. The distribution of the alpha type of ganglion  
30 cells in the cat's retina. *The Journal of Comparative Neurology* 159, 419-437 (1975).
- 31 56. Wässle, H., Boycott, B.B. & Illing, R.B. Morphology and mosaic of on- and off-beta cells in  
32 the cat retina and some functional considerations. *Proc. R. Soc. Lond. B Biol. Sci.* 212, 177-  
33 195 (1981).
- 34 57. Madarasz, M., Gerle, J., Hajdu, F., Somogyi, G. & Tombol, T. Quantitative histological  
35 studies on the lateral geniculate nucleus in the cat. II. Cell numbers and densities in the  
36 several layers. *J. Hirnforsch.* 19, 159-164 (1978).
- 37 58. Fitzgibbon, T. Organization of reciprocal connections between the perigeniculate nucleus  
38 and dorsal lateral geniculate nucleus in the cat: a transneuronal transport study. *Vis.*  
39 *Neurosci.* 19, 511-520 (2002).
- 40 59. Abercrombie, M. Estimation of nuclear population from microtome sections. *The*  
41 *Anatomical Record* 94, 239-247 (1946).
- 42 60. Friedlander, M.J., Lin, C.S., Stanford, L.R. & Sherman, S.M. Morphology of functionally  
43 identified neurons in lateral geniculate nucleus of the cat. *J. Neurophysiol.* 46, 80-129  
44 (1981).
- 45 61. Montero, V.M. & Zempel, J. Evidence for two types of GABA-containing interneurons in  
46 the A-laminae of the cat lateral geniculate nucleus: a double-label HRP and GABA-  
47 immunocytochemical study. *Exp. Brain Res.* 60, 603-609 (1985).
